# Supplementary material for: A pH-insensitive, ratiometric chemosensor for citrate using europium luminescence
Source: Royal Society of Chemistry journal article supplement (doi:10.1039/b502553b), 2005-01-01
Supplement: b502553b.pdf [file b502553b.pdf]

### A pH-insensitive ratiometric chemosensor for citrate using europium luminescence

Junhua Yu, David Parker\*

Department of Chemistry, University of Durham, UK

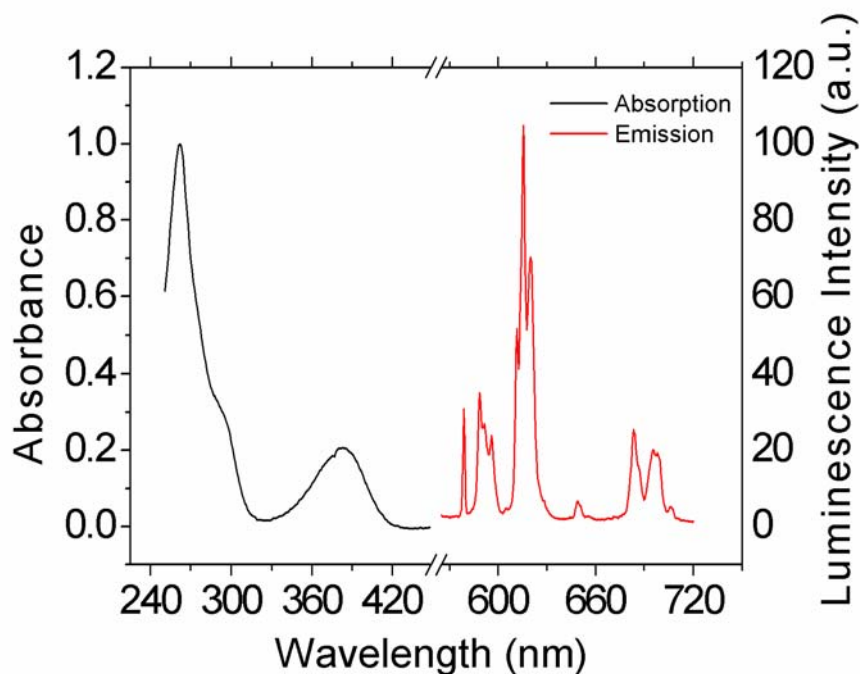

**Fig. 1S.** The absorption and luminescence spectrum of **EuPheesterPT**

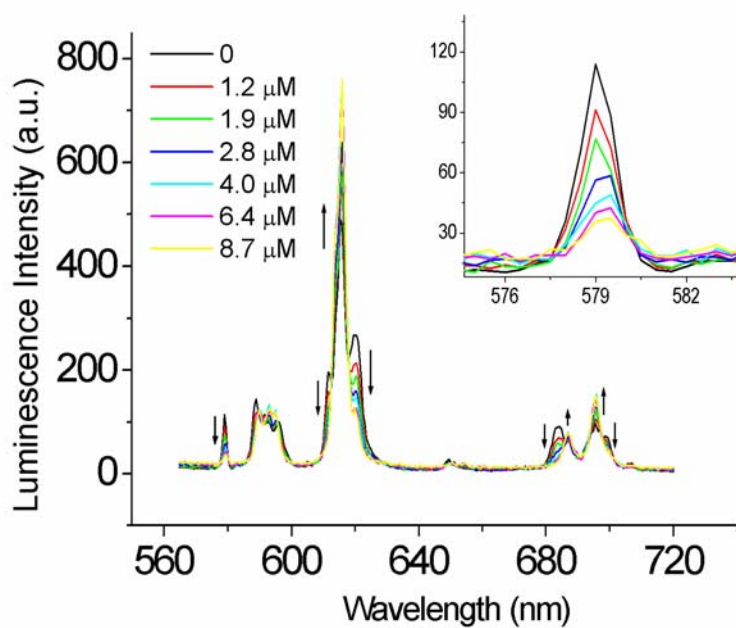

**Fig. 2S.** The luminescence spectra of aqueous **EuPheesterPT** solution ( $5 \times 10^{-6}$  mol·L<sup>-1</sup>) upon the titration of sodium citrate; excited at 384 nm.

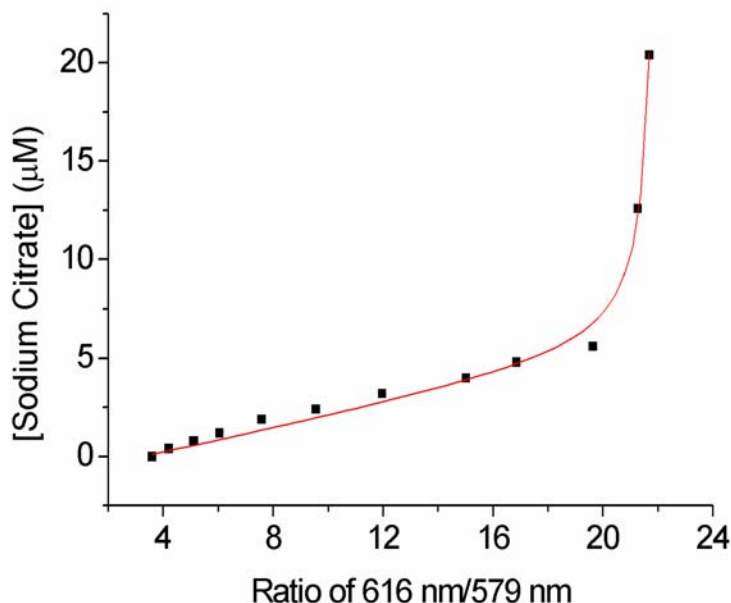

**Fig. 3S.** The intensity ratio of 616 nm/579 nm of the aqueous **EuPheesterPT** solution ( $5 \times 10^{-6}$  mol·L<sup>-1</sup>) upon the titration of sodium citrate; excited at 384 nm. The affinity constant is fitted by using equation:

$$[citrate] = \frac{\frac{(F - F_0)}{(F_1 - F_0)} + [Eu] * \frac{(F - F_0)}{(F_1 - F_0)} - [Eu] * \left( \frac{(F - F_0)}{(F_1 - F_0)} \right)^2}{K}}{1 - \frac{(F - F_0)}{(F_1 - F_0)}}$$

where [citrate] is the total concentration citrate in the solution; [Eu] is the total concentration of the complex; K is the affinity constant; F is the ratio of 616 nm/579; F<sub>0</sub> is the ratio at the beginning; F<sub>1</sub> is the final ratio. This equation is deduced from

$$K = \frac{[citrateEu]}{[citrate_f][Eu_f]}$$

where [citrateEu] is the concentration of the citrate-coordinated complex; [citrate<sub>f</sub>] is the concentration of free citrate in the mixture, and [Eu<sub>f</sub>] is the concentration of the free complex.

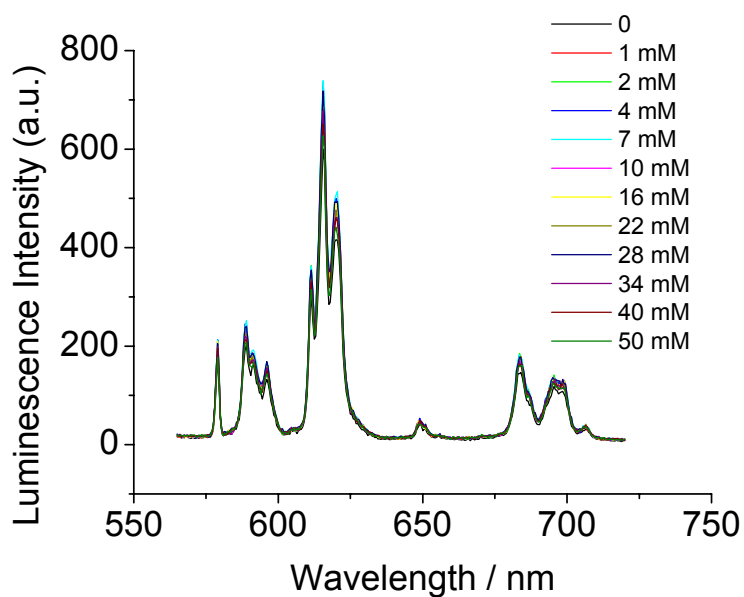

**Fig. 4S.** The luminescence spectra of **EuPheesterPT** ( $5 \times 10^{-6} \text{ mol}\cdot\text{L}^{-1}$ ) upon the titration of sodium bicarbonate in 0.1 mol·L<sup>-1</sup> MOPS buffer; excited at 384 nm. The intensity and spectral forms change little.

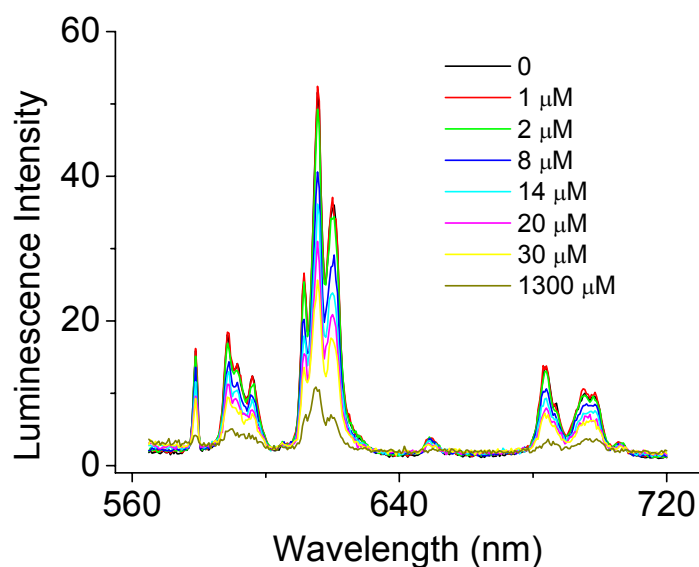

**Fig. 5S.** The luminescence spectra of **EuPheesterPT** ( $5 \times 10^{-6} \text{ mol}\cdot\text{L}^{-1}$ ) upon the titration of Na<sub>2</sub>HPO<sub>4</sub> in 0.1 mol·L<sup>-1</sup> MOPS buffer; excited at 384 nm. The intensity decreases as the concentration of phosphate increases.

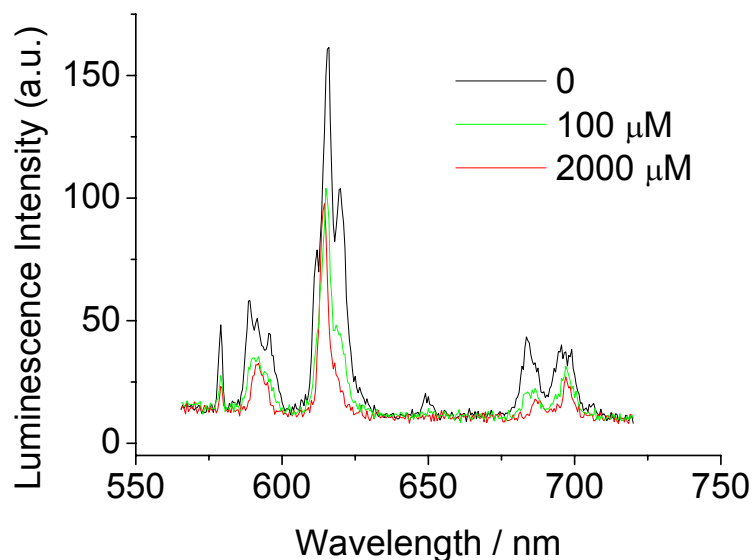

**Fig. 6S.** The luminescence spectra of aqueous **EuPheesterPT** solution ( $5 \times 10^{-6} \text{ mol}\cdot\text{L}^{-1}$ ) upon the titration of ATP; excited at 384 nm. ADP, AMP, and TMP have the similar behaviors. The intensity decreases as the concentration of phosphate increases, and the spectral forms also change.

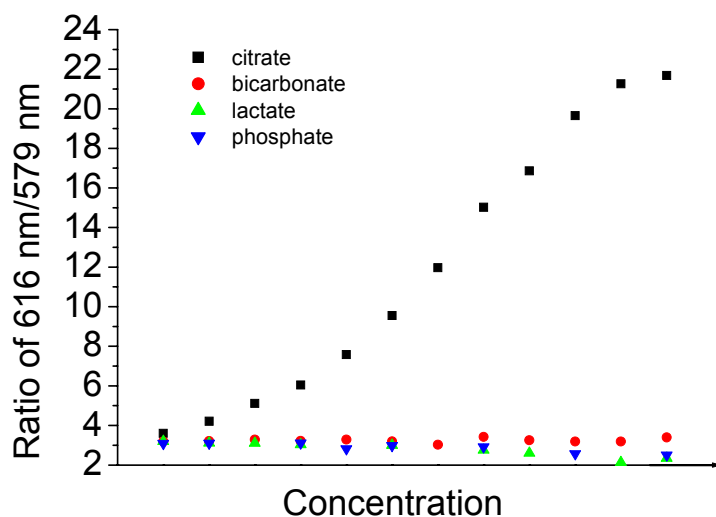

**Fig. 7S.** The luminescence intensity ratio of 616 nm to 579 nm of aqueous **EuPheesterPT** solution ( $5 \times 10^{-6} \text{ mol}\cdot\text{L}^{-1}$ ) upon the titration of citrate, phosphate, bicarbonate, lactate, respectively; excited at 384 nm. Here it shows clear that, among these anions, only citrate exhibits good affinity to the complex.

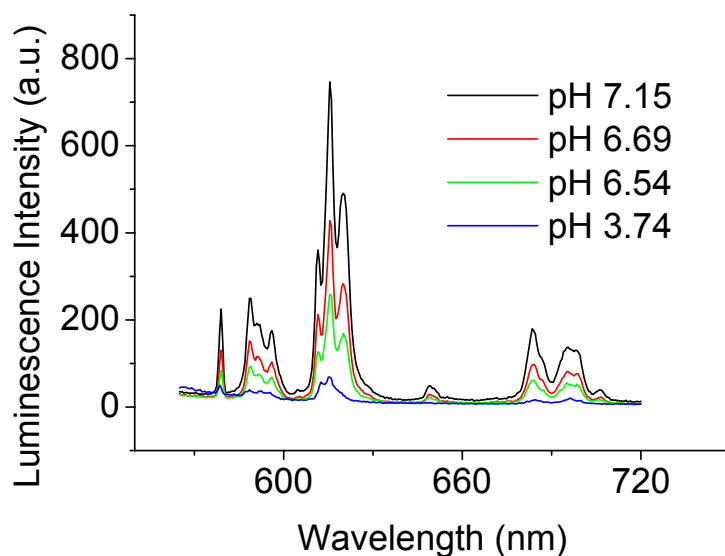

**Fig. 8S.** The luminescence spectra of aqueous **EuPheesterPT** solution ( $5 \times 10^{-6}$  mol·L<sup>-1</sup>) at varied pH; the spectrum at pH 3.74 may subject to the decompose of **EuPheesterPT**; excited at 384 nm. The intensity decreases along with the solution from neutral to acidic.

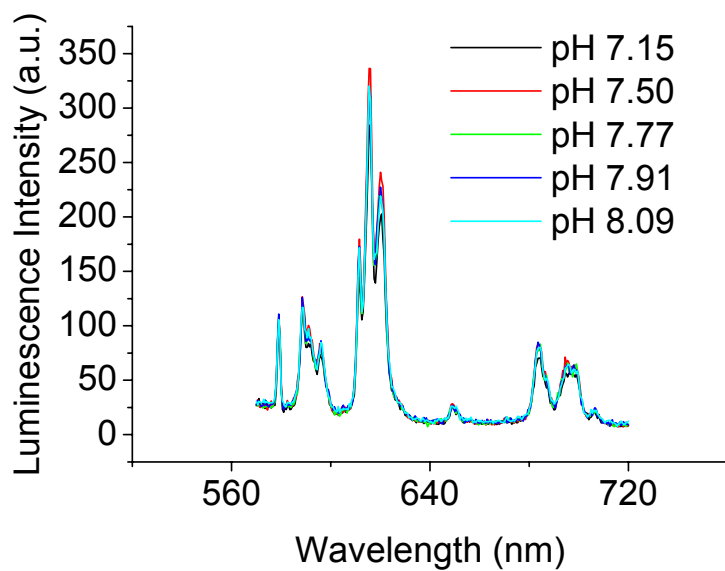

**Fig. 9S.** The luminescence spectra of aqueous **EuPheesterPT** solution ( $5 \times 10^{-6}$  mol·L<sup>-1</sup>) at varied pH; excited at 384 nm. The intensity changes very little in this pH range

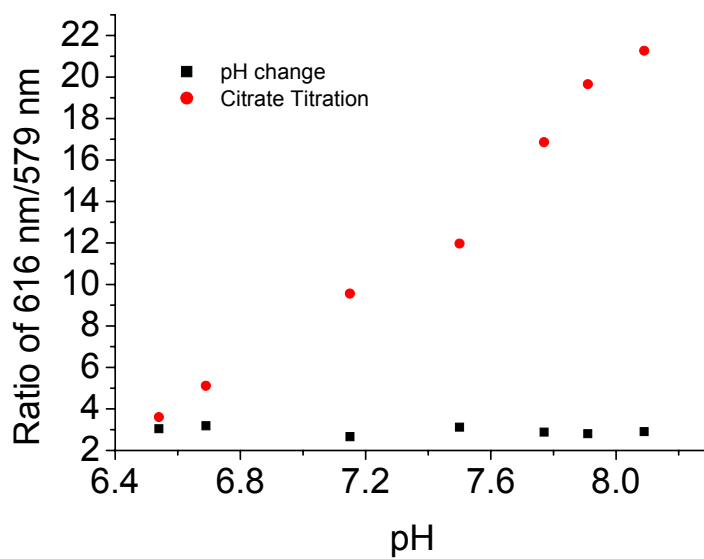

**Fig. 10S.** The luminescence intensity ratio of 616 nm to 579 nm of aqueous **EuPheesterPT** solution ( $5 \times 10^{-6} \text{ mol}\cdot\text{L}^{-1}$ ) at varied pH; excited at 384 nm. The curve of citrate titration is just to show the emission ratio scale of 616 nm to 579 nm upon the titration of citrate, **not corresponding to the pH change**.
